# Supplementary material for: Drug induced micelle-to-vesicle transition in aqueous solutions of cationic surfactants
Source: Royal Society of Chemistry journal article supplement (doi:10.1039/c6ra25577a), 2017-01-01
Supplement: c6ra25577a1.pdf [file c6ra25577a1.pdf]

**Drug induced micelle-to-vesicle transition in aqueous solutions of cationic surfactants**

Zuber S. Vaid,<sup>1</sup> Arvind Kumar,<sup>2</sup> Omar A. El Seoud,<sup>\*,3</sup> and Naved I. Malek,<sup>\*,1,3</sup>

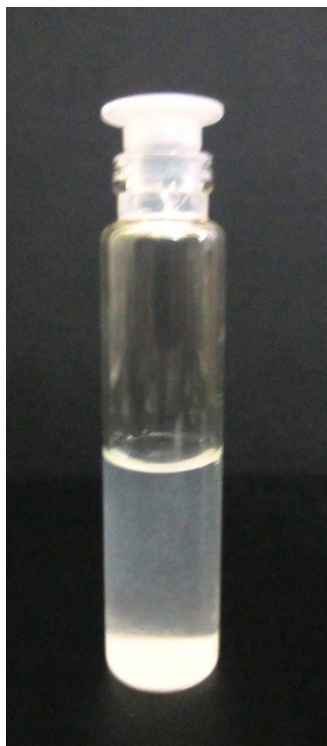

Figure SM-1- Decreasing the solution pH from 6.2 to 3 causes precipitation
